# Supplementary material
Source: PubMed Central journal article supplement (PMC8172470)
Supplement: NIHMS1695099-supplement-2.pdf [file NIHMS1695099-supplement-2.pdf]

**Table S2. Cumulative Burden of Morbidity based on Number and Severity of Individual Adverse Health Outcomes <sup>a</sup>**

| <b>Grade</b> | <b>None</b> | <b>Very Low</b> | <b>Low</b> | <b>Medium</b> | <b>High</b> | <b>Very High</b> | <b>Severe</b> |
|--------------|-------------|-----------------|------------|---------------|-------------|------------------|---------------|
| <b>1</b>     | 0           | ≥1              | Any number | Any number    | Any number  | Any number       | Any number    |
| <b>2</b>     | 0           | 0               | ≥1         | Any number    | Any number  | Any number       | Any number    |
| <b>3</b>     | 0           | 0               | 0          | ≥1            | ≥2          | ≤1               | ≥2            |
| <b>4</b>     | 0           | 0               | 0          | 0             | 0           | 1                | 1             |

<sup>a</sup> The table is adapted from Kerns et al.(15)
