# Supplementary material
Source: PubMed Central journal article supplement (PMC8172470)
Supplement: NIHMS1695099-supplement-3.pdf [file NIHMS1695099-supplement-3.pdf]

**Table S3. Univariate (Unadjusted) Models of the Association Between Each Variable and Use of Medications for Anxiety and/or Depression.**

| <b>Variable</b>                                        | <b>OR (95%CI)</b> | <b>P value</b> | <b>Omnibus P value</b>         |
|--------------------------------------------------------|-------------------|----------------|--------------------------------|
| <b>Age at clinical evaluation</b>                      |                   |                | 0.25 <sup>a</sup>              |
| <29                                                    | Ref.              |                |                                |
| 30-39                                                  | 0.99 (0.61-1.58)  | 0.95           |                                |
| 40-49                                                  | 1.35 (0.83-2.20)  | 0.22           |                                |
| 50-59                                                  | 1.56 (0.90-2.69)  | 0.11           |                                |
| ≥ 60                                                   | 1.66 (0.69-3.96)  | 0.25           |                                |
| <b>Race</b>                                            |                   |                | <b>0.16 <sup>a</sup></b>       |
| White                                                  | Ref.              |                |                                |
| African American                                       | 1.24 (0.28-5.45)  | 0.78           |                                |
| Asian                                                  | 0.54 (0.20-1.51)  | 0.24           |                                |
| Other                                                  | 0.36 (0.13-1.00)  | 0.05           |                                |
| <b>Education</b>                                       |                   |                | 0.11 <sup>a</sup>              |
| High school or less                                    | Ref.              |                |                                |
| After high school but not college graduate             | 0.93 (0.54-1.60)  | 0.79           |                                |
| College or university graduate                         | 0.61 (0.36-1.03)  | 0.06           |                                |
| Post-graduate                                          | 0.92 (0.53-1.61)  | 0.78           |                                |
| <b>Employment status</b>                               |                   |                | <b>&lt;0.0001 <sup>a</sup></b> |
| Unemployed                                             | Ref.              |                |                                |
| Employed                                               | 0.38 (0.23-0.64)  | <b>0.0003</b>  |                                |
| Retired                                                | 0.46 (0.13-1.64)  | 0.23           |                                |
| On disability leave                                    | 2.01 (0.88-4.62)  | 0.099          |                                |
| <b>Marital status</b>                                  |                   |                | 0.25 <sup>a</sup>              |
| Single or never married                                | Ref.              |                |                                |
| Married/living as married                              | 1.19 (0.81-1.74)  | 0.37           |                                |
| Divorced/separated                                     | 1.74 (0.90-3.36)  | 0.10           |                                |
| <b>Health insurance coverage</b>                       |                   |                | 0.11 <sup>a</sup>              |
| No                                                     | Ref.              |                |                                |
| Yes                                                    | 1.83 (0.88-3.80)  | 0.11           |                                |
| <b>Smoking status</b>                                  |                   |                | 0.06 <sup>a</sup>              |
| Never                                                  | Ref.              |                |                                |
| Former                                                 | 1.53 (1.08-2.18)  | <b>0.02</b>    |                                |
| Current                                                | 1.20 (0.65-2.22)  | 0.57           |                                |
| <b>Average no. alcoholic drinks in past year</b>       |                   |                | <b>0.05 <sup>a</sup></b>       |
| Rarely or never                                        | Ref.              |                |                                |
| 1-3 per month                                          | 1.02 (0.61-1.72)  | 0.93           |                                |
| 1-6 per week                                           | 0.59 (0.39-0.92)  | <b>0.02</b>    |                                |
| ≥ 1 per day                                            | 0.69 (0.41-1.15)  | 0.15           |                                |
| <b>Engage in vigorous physical activity (≥ 6 METs)</b> |                   |                | <b>0.0005 <sup>a</sup></b>     |
| No                                                     | Ref.              |                |                                |
| Yes                                                    | 0.55 (0.34-0.77)  | <b>0.0005</b>  |                                |
| <b>Time since completion of chemotherapy, years</b>    |                   |                | 0.75                           |
| <2                                                     | Ref.              |                |                                |
| 2-<5                                                   | 1.21 (0.78-1.89)  | 0.40           |                                |
| 5-<10                                                  | 1.04 (0.63-1.71)  | 0.87           |                                |
| ≥ 10                                                   | 1.25 (0.78-2.00)  | 0.36           |                                |
| <b>Patient reported hearing loss</b>                   |                   |                | <b>&lt;0.0001 <sup>a</sup></b> |
| None                                                   | Ref.              |                |                                |

| Variable                                        | OR (95%CI)        | P value           | Omnibus P value               |
|-------------------------------------------------|-------------------|-------------------|-------------------------------|
| <b>Patient reported hearing loss, continued</b> |                   |                   |                               |
| Grade 1                                         | 2.02 (1.37-2.98)  | <b>0.0004</b>     |                               |
| Grade 2 or grade 3                              | 2.68 (1.75-4.11)  | <b>&lt;0.0001</b> |                               |
| <b>Tinnitus</b>                                 |                   |                   | <b>&lt;0.0001<sup>a</sup></b> |
| None                                            | Ref.              |                   |                               |
| Grade 1                                         | 1.68 (1.12-2.51)  | <b>0.01</b>       |                               |
| Grade 2                                         | 2.97 (1.73-5.10)  | <b>&lt;0.0001</b> |                               |
| Grade 3                                         | 3.67(2.20-6.11)   | <b>&lt;0.0001</b> |                               |
| <b>Peripheral sensory neuropathy</b>            |                   |                   | <b>&lt;0.0001<sup>a</sup></b> |
| None                                            | Ref.              |                   |                               |
| Grade 1                                         | 1.66 (1.06-2.59)  | <b>0.03</b>       |                               |
| Grade 2                                         | 3.29(2.01-5.26)   | <b>&lt;0.0001</b> |                               |
| Grade 3                                         | 2.84(1.74-4.64)   | <b>&lt;0.0001</b> |                               |
| <b>Patient-reported kidney disease</b>          |                   |                   | 0.06 <sup>a</sup>             |
| None                                            | Ref.              |                   |                               |
| Grade 1 or grade 2                              | 2.25 (0.98-4.15)  | 0.06              |                               |
| <b>CBM<sub>pt</sub> score</b>                   |                   |                   | <b>&lt;0.0001<sup>a</sup></b> |
| None                                            | Ref.              |                   |                               |
| Very low                                        | 1.78 (1.02-3.11)  | <b>0.04</b>       |                               |
| Low                                             | 3.72(2.13-6.52)   | <b>&lt;0.0001</b> |                               |
| Medium                                          | 4.56 (2.60-8.00)  | <b>&lt;0.0001</b> |                               |
| High                                            | 4.42 (1.76-11.13) | <b>0.002</b>      |                               |

**Note:** Each row of analysis is derived from a binomial logistic regression model in which we report the effect for the independent variable of interest and use of medications for anxiety and/or depression (yes, no) as the outcome (dependent) variable.

P values with boldface indicates significance at  $P < 0.05$ .

<sup>a</sup> Variables with Omnibus (Wald chi-square from type 3 analysis of effects)  $P \leq 0.25$  were selected to be included in final multivariable model.
